# Supplementary material for: Astragaloside IV-PESV inhibits prostate cancer tumor growth by restoring gut microbiota and microbial metabolic homeostasis via the AGE-RAGE pathway
Source: Springer Nature journal article supplement (doi:10.1186/s12885-024-12167-z), 2024-04-15

**Figure 4B**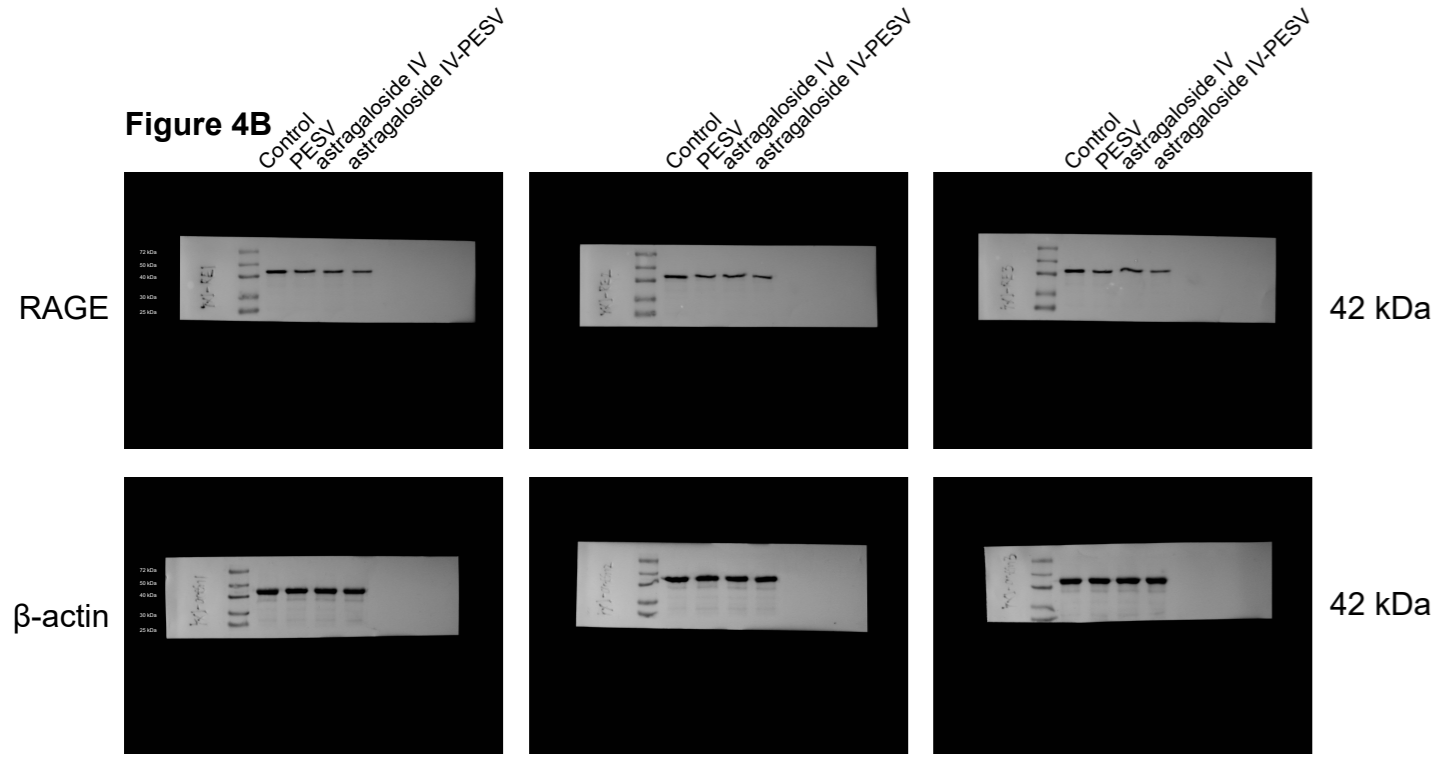**Figure 5H**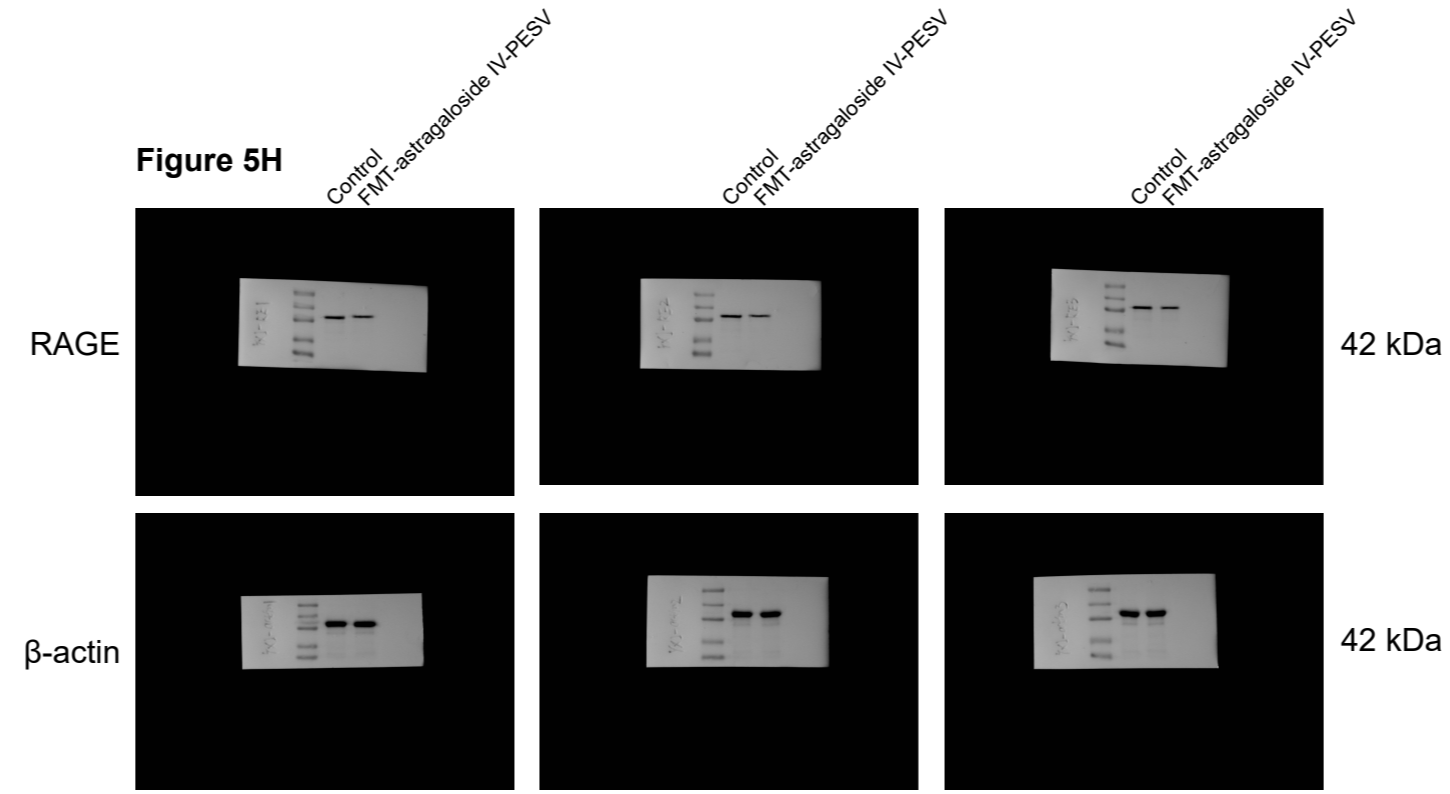**Figure 6H**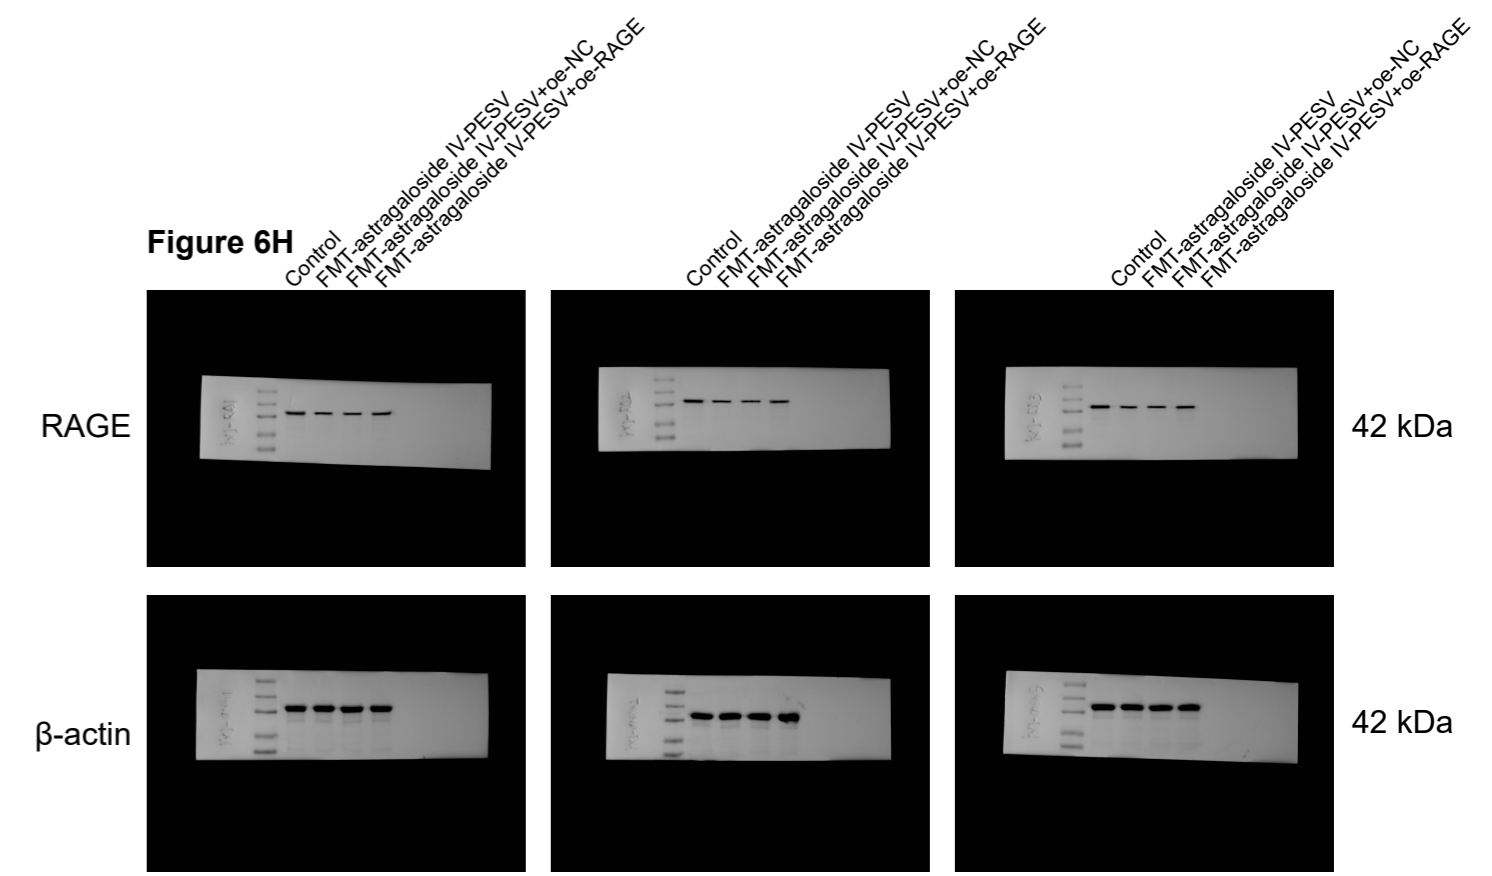**Figure 4C**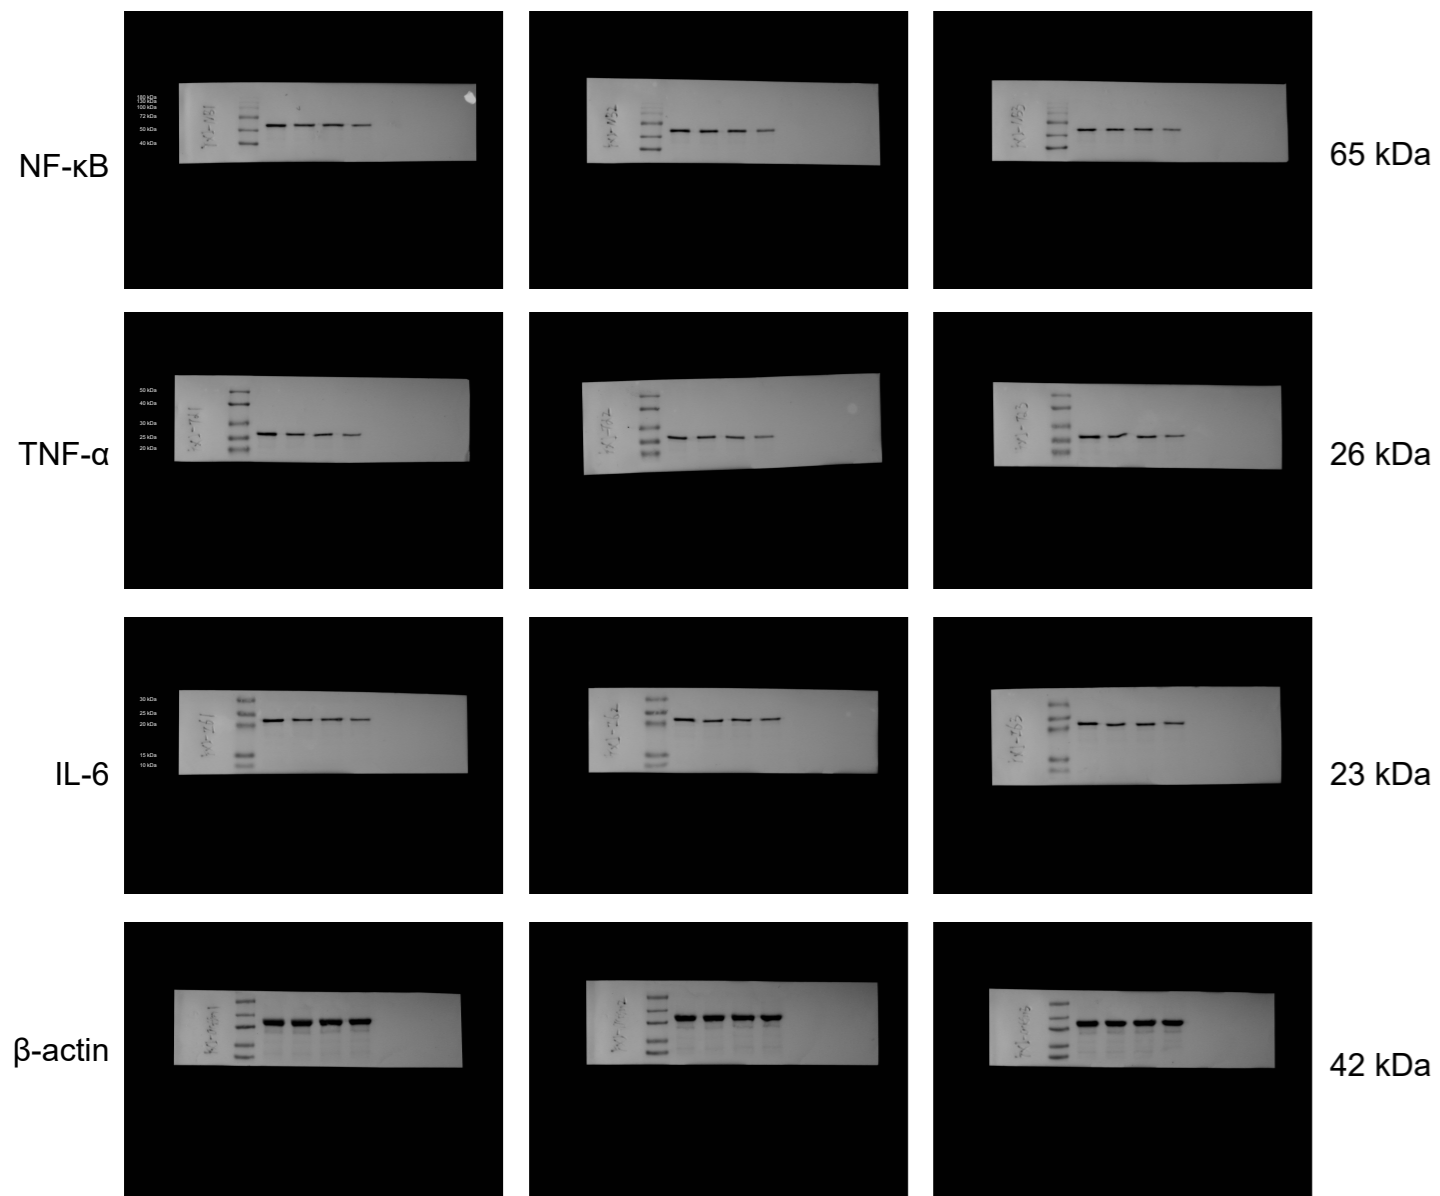**Figure 5I**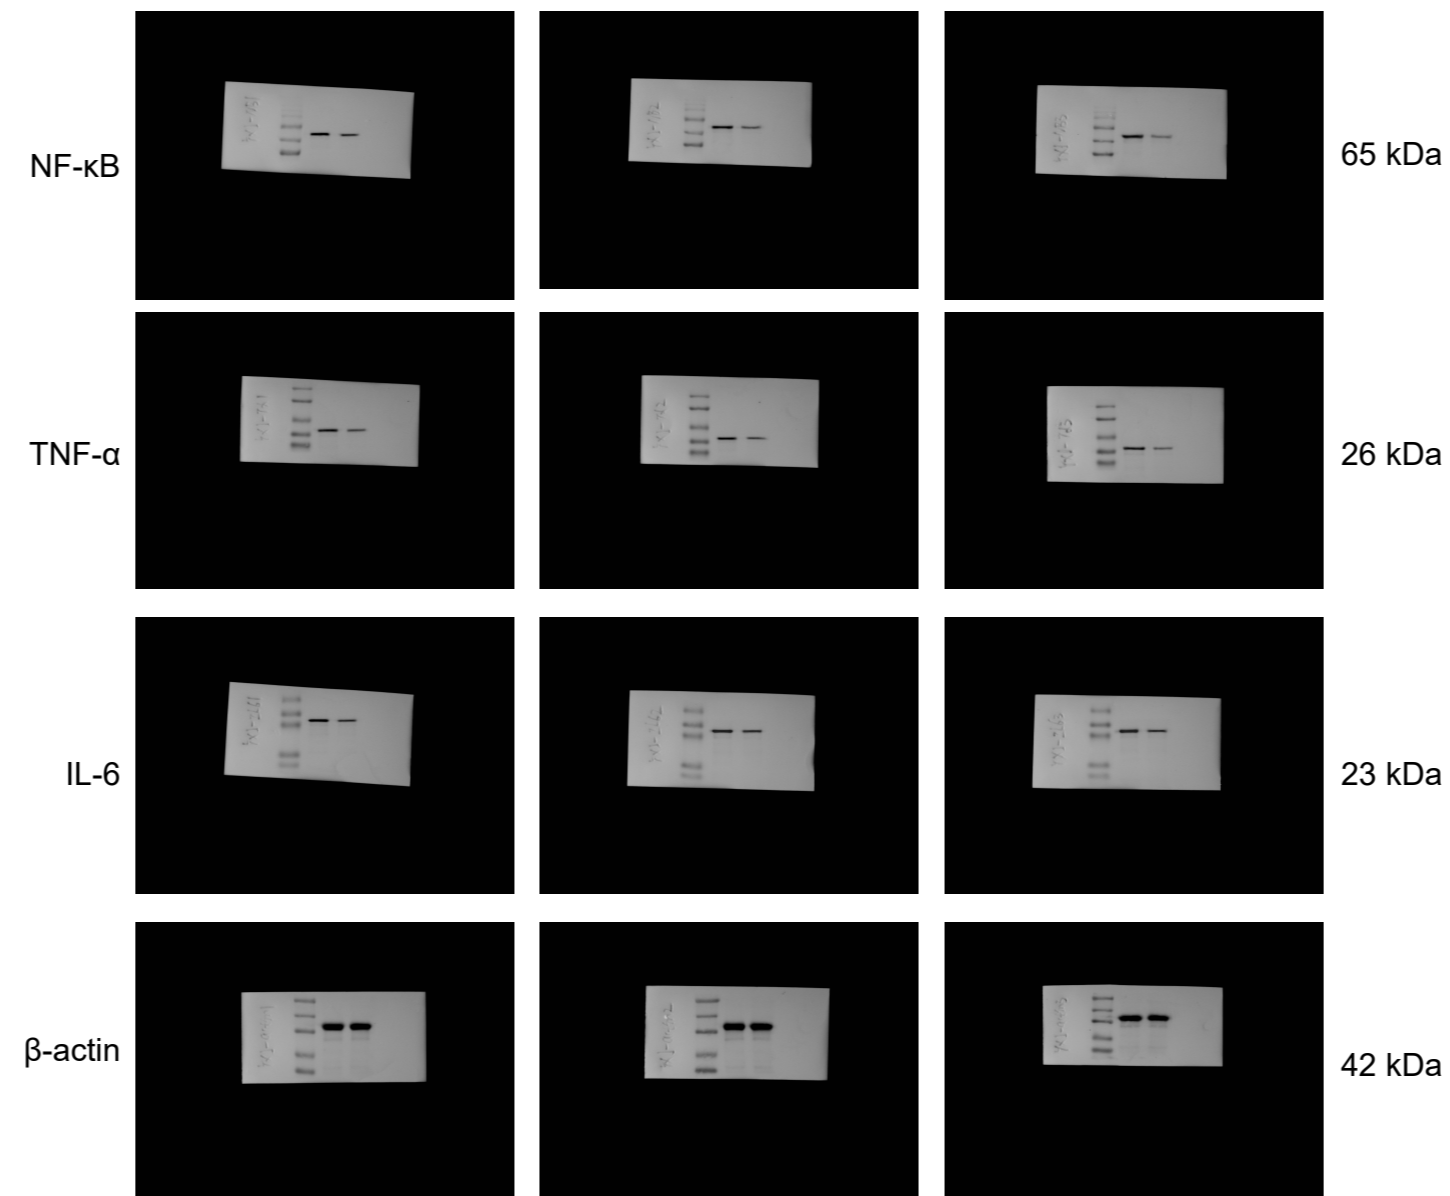**Figure 6I**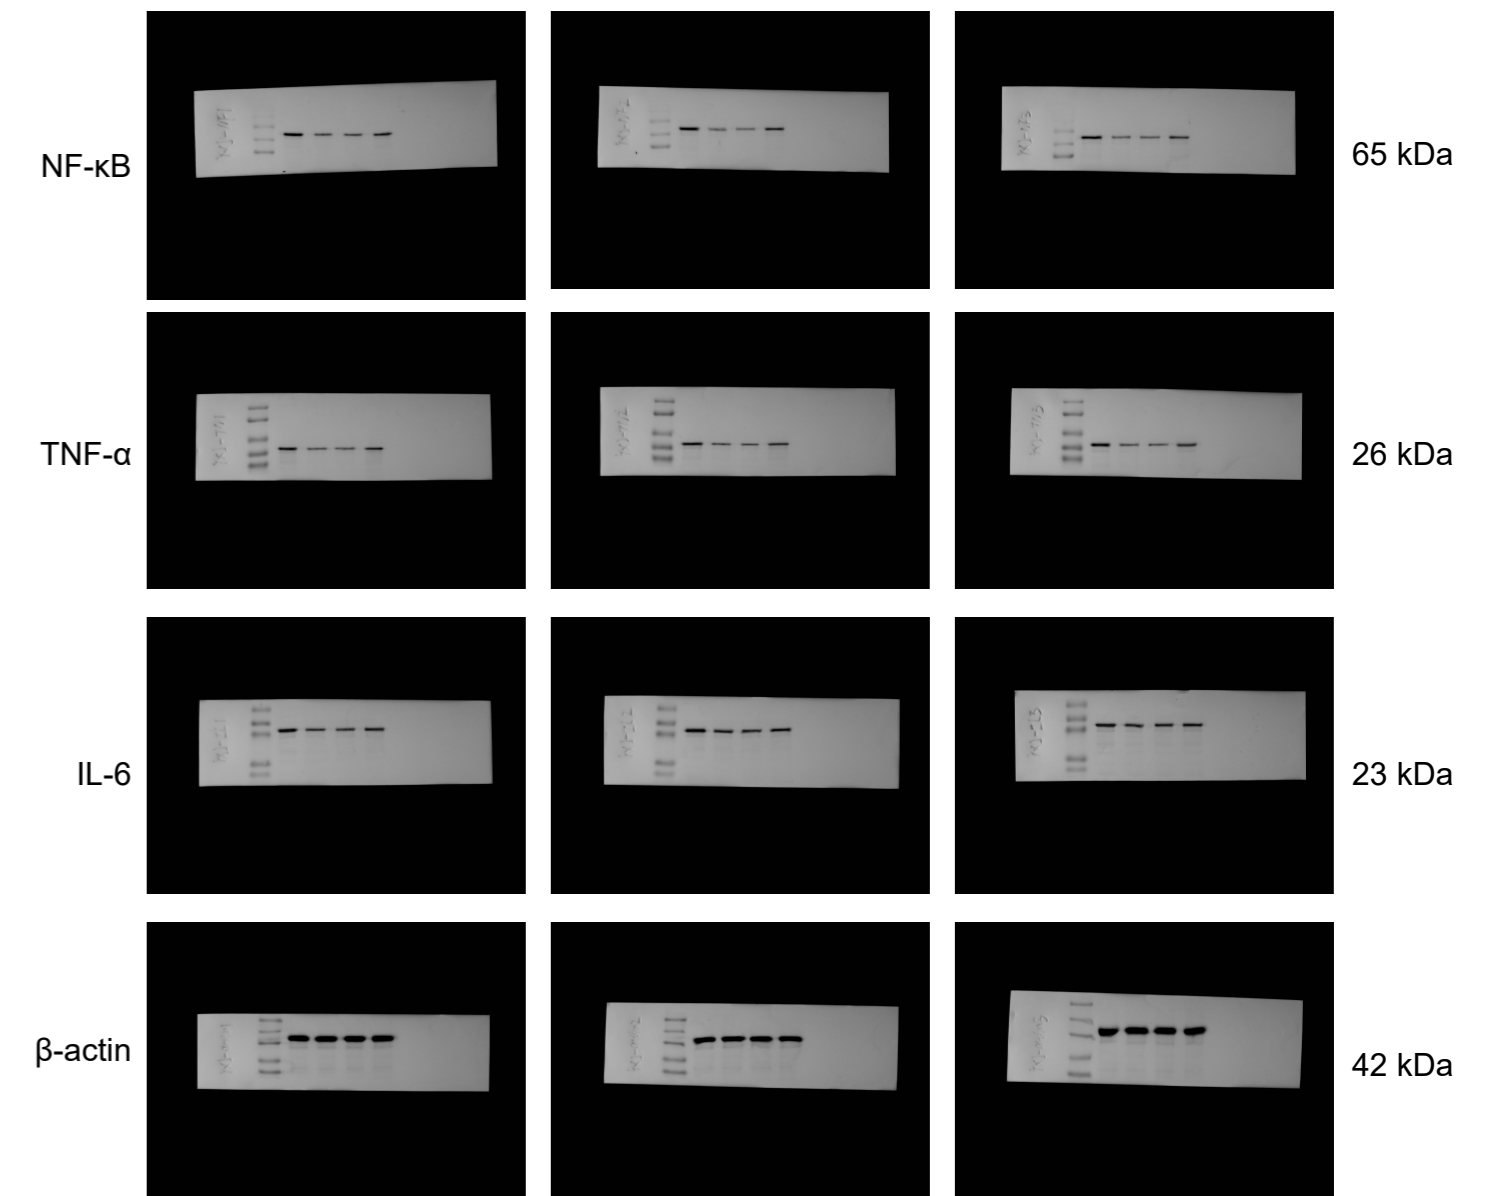

Supplement: MOESM3 [file 26980754]
